# Supplementary material
Source: publisher figshare collection journal article supplement (https://adisjournals.figshare.com/ndownloader/files/28432218)
Supplement: Supplementary file 1 [file 28432218]

# Preference for Telemedicine Versus In-Person-Visit Among Patients with Psoriasis Receiving Biological Drugs

Paolo Gisondi; Francesco Bellinato; Stefano Piaserico;  
Sara Di Leo; Simone Cazzaniga; Luigi Naldi

DOI: 10.1007/s13555-021-00555-3

**Telemedicine** has become increasingly common for the care of dermatological conditions since the onset of the COVID-19 pandemic

**Certain patients with plaque psoriasis could be good candidates for such care**

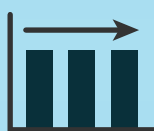

Stable condition

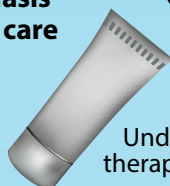

Undergoing maintenance therapy with biological drugs

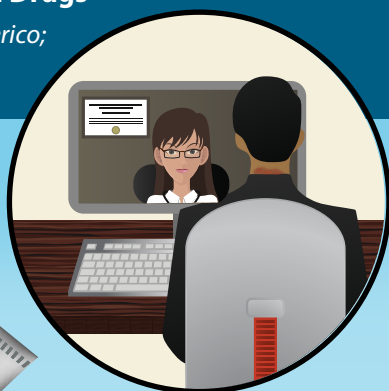

## Main Study Question

Which patients prefer telemedicine over in-person visits?

Multicenter, cross-sectional study

Questionnaire used as primary tool

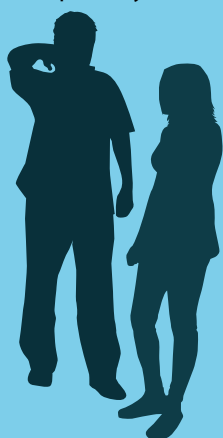

### Part 1: Socio-demographics

- Sex
- Age
- Biological type
- Education
- Occupation
- Frequency of dermatological follow-up
- Distance from hospital
- Need for accompaniment
- Experience with telemedicine and video communication tools

### Part 2: Telemedicine preference

- Would you prefer to have your next follow-up visit in person or with telemedicine?
- What are your reasons for this preference?

### Inclusion criteria

> 18 years of age

Stable clinical remission

Diagnosis of chronic plaque psoriasis

Maintenance treatment with licensed biological drug

**Overall, 246 patients were recruited**

**(120 men and 125 women)**

**Preference for telemedicine was found to be strongly associated with certain patient characteristics**

Relatively young age  
(49.3 vs 56.7 years)

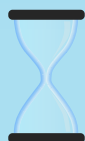

Relatively high educational level

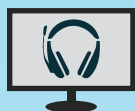

Confident in use of video communication tools

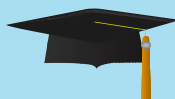

Managerial job

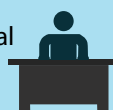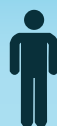

No need to be accompanied to visit

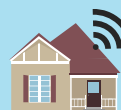

Home internet connection

## Why do they prefer telemedicine?

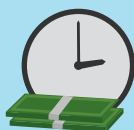

Save time and money

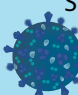

Safety given the COVID-19 pandemic

**Inability to use video communication tools is the main barrier**

**Almost half** of patients with stable psoriasis receiving biological drugs may be good candidates for telemedicine.

Providing patients with **training in telecommunication** may increase patient preferences for such care.

PEER-REVIEWED  
INFOGRAPHIC

Adis

OPEN  
ACCESS

This infographic represents the opinions of the authors. For a full list of declarations, including funding and author disclosure statements, please see the full text online.

© The authors, CC-BY-NC 2021
